# Assessment of the impact of the new blister packaging of Biktarvy® (B/F/TAF) on treatment satisfaction of people living with HIV

## Authors

Cruz JP<sup>1,2</sup>, Santos O<sup>3,4</sup>, Rodrigues M<sup>1</sup>, Morais R<sup>1</sup>, Borralho T<sup>1</sup>, Ferreira F<sup>1</sup>, Ferreira A<sup>5</sup>, Albuquerque J<sup>5,6</sup>, Nogueira P<sup>3</sup>, Silva MP<sup>7</sup>, and Antunes F<sup>3</sup>

1. Serviços Farmacêuticos da Unidade de Saúde Local Santa Maria, Lisboa, Portugal
2. iMed.Ulisboa – Institute for Medicine Research, Faculdade de Farmácia, Universidade de Lisboa, Portugal
3. Instituto de Saúde Ambiental, Faculdade de Medicina, Universidade de Lisboa, Portugal
4. Unbreakable Idea Research, Painho, Portugal
5. BlueClinical – Investigação e Desenvolvimento em Saúde, Lda, Porto, Portugal
6. Centro de Estatística e Aplicações, Faculdade de Ciências, Universidade de Lisboa, Portugal
7. Gilead Sciences, Lda, Lisboa, Portugal

## 1 Abstract

2 **Background:** Antiretroviral therapy (ART) is highly effective in people living with HIV  
3 (PLHIV), but its success depends on treatment satisfaction and adherence. A determinant of  
4 satisfaction regards how the medication is delivered to the patient, namely how it is  
5 contained (e.g., bottles, blisters, etc). A new packaging of Biktarvy® has been introduced as  
6 a monthly blister, aiming to improve satisfaction, facilitate traceability of daily medication,  
7 portability, and discretion (reducing stigma associated with ART), and, ultimately, enhance  
8 adherence.

9 **Goals:** The study's objective was to assess the impact of changing the packaging of  
10 Biktarvy® (B/F/TAF) from a standard pill bottle to a monthly blister with a weekly calendar  
11 on therapy satisfaction. Additionally, the association between treatment satisfaction and  
12 selected patients' characteristics (e.g., ART duration) was evaluated. A secondary goal was  
13 to characterize the association between the change of packaging on patient's adherence.

14 **Methods:** This is an observational longitudinal (retrospective and prospective) study with  
15 patients following ART for at least six months (ambulatory clinical management) recruited  
16 according to a non-probabilistic sequential sampling. Satisfaction was measured at two  
17 different moments: at baseline, HIVTSQs were used to assess satisfaction within the  
18 previous six months' use of medication containers (bottles). Six months later, patients filled  
19 in the HIVTSQc to assess their perception of satisfaction change with the new packaging  
20 (blister). Adherence was assessed by pharmacy medication dispensing at the hospital.

21 **Results:** The study enrolled 105 patients in two selected centers (102 patients completed  
22 the study). Patients were significantly more satisfied (HIVTSQc scores) with ART when  
23 using the new Biktarvy® blister pack package. Importantly, gains of ART satisfaction were  
24 higher among those less satisfied with the bottle packaging. No significant associations  
25 were found between HIVTSQc scores and sociodemographic or ART-related variables.

26 **Keywords:** PLHIV; Antiretroviral therapy; Patient satisfaction; Adherence

## 28 Introduction

29 In the last decade, antiretroviral therapy (ART) has demonstrated high efficacy, resulting in  
30 higher than 90% viral suppression rates. Therapeutic guidelines identify several regimens  
31 that allow adequate long-term suppression of viral load in people living with HIV infection.

32 (PLHIV), including single tablet coformulations<sup>1</sup>.  
33 The success of ART depends on treatment satisfaction and adherence, which are impacted by  
34 several factors, including medication usage facility, patient perception of results, and side  
35 effects. These factors must be considered when making treatment decisions in the clinical  
36 management of PLHIV<sup>2</sup>. For all these reasons, satisfaction has been considered relevant in  
37 the assessment and differentiation between therapeutic regimens, aiming to improve clinical  
38 outcomes, the well-being of PLHIV, and maximizing improvement of health status<sup>3,4</sup>.  
39 Medication packaging in blister packs, with a weekly calendar, has the potential to  
40 contribute to improving adherence to ART and optimizing outcomes in the treatment of  
41 PLHIV. In the scope of treatment of hypertension, patients with medication in blisters with  
42 weekly calendars renewed their prescription more frequently, had higher Medication  
43 Possession Ratio (MPR) and better control of blood pressure at 12 months<sup>5</sup>. Additionally, a  
44 meta-analysis of 52 studies (n = 22 858) involving patients with different diseases showed  
45 an increase in adherence from 63% to 71%, related to the change in the packaging of the  
46 medication to blisters with calendars, which demonstrates a practical improvement in  
47 treatment adherence because of this tablet package modification<sup>6</sup>.  
48 Biktarvy® is indicated for the treatment of adults infected with human immunodeficiency  
49 virus type 1 (HIV-1) without present or past evidence of viral resistance to the integrase  
50 inhibitor class, emtricitabine or tenofovir. Currently, Biktarvy® new package contains the  
51 same number of units (30 tablets), but packaged in four blisters of seven tablets, with a  
52 weekly calendar, and one blister of two tablets. This new packaging has the potential for  
53 the patient to improve the adherence to therapy, facilitating the traceability of daily  
54 medication dosage, its portability and greater medication discretion, reducing the risk of  
55 stigma associated with ART. In Portugal, there was a complete replacement of units of  
56 Biktarvy® in bottles by Biktarvy® in blisters, until May 2022<sup>7</sup>.  
57 This project aimed to estimate the impact of the new Biktarvy® packaging containing the  
58 same number of units (30 tablets), but packed in four blisters of seven tablets, with a weekly  
59 calendar, and one blister of two tablets, on patient's satisfaction (main outcome) and  
60 adherence (secondary outcome) with ART.

## 61 **Materials and methods**

62

### 63 **Research strategies**

64 The study followed an observational retrospective/prospective design with PLHIV being  
65 followed in two Portuguese hospitals. Data collected referred to a period of ART of at least  
66 six months before the change of packaging (bottle; retrospective data) and six months of  
67 experience with the new packaging (blister; prospective data).

68 The study was conducted in accordance with the clinical study protocol (CSP), the  
69 International Council for Harmonization, Good Clinical Practices, and the Declaration of  
70 Helsinki, as well as the applicable European and Portuguese laws and regulations approved  
71 by the Ethics Committee of the Centro Académico de Medicina de Lisboa (reference  
72 number 226/22).

73 All patients signed a written informed consent form before entering the study. Each  
74 participant received a full explanation of the project goals, procedures, and implied tasks  
75 (and burden) from patients. Subjects were informed that their participation was voluntary  
76 and assured that they could abandon the study at any time without any prejudice. They also  
77 received a copy of the subject's information and, after being fully clarified, signed the  
78 informed consent form.

79

### 80 **Sampling: inclusion and exclusion criteria**

81 The sample size was planned to enroll 100 PLHIV (including at least 20 women) on  
82 treatment with Biktarvy®, being over 18 years old, under ambulatory clinical management  
83 in two Portuguese hospitals for at least six months and accepting to participate voluntarily  
84 in the study.

85 Patients coming to the hospital pharmacy were included sequentially (non-probabilistic  
86 sampling), and the sample size was determined to allow an estimate of the patients with  
87 timely prescription delivery in the hospital pharmacy (before the time of prescription  
88 collection), with the precision of 7% to 10%. The first patient visit occurred in August 2022,  
89 and the last patient visit occurred in December 2023.

90

### 91 **Data collection and instruments**

92 Subjects' data was directly collected on paper-based clinical reports forms (CRFs).  
93 Subsequently, data were transcribed into the study database by a data entry operator. Each  
94 patient was given a study reference number, which was archived in the clinical file.

95 Data collected included demographic information (age, gender, nationality, level of  
96 education), clinical and laboratory data (duration of ART, viral load, and CD4 T  
97 lymphocytes count). For assessing satisfaction with ART, two instruments have been used:  
98 the Portuguese version of the HIV Treatment Satisfaction Questionnaires version "s"  
99 (HIVTSQs), at baseline (retrospective assessment related to the previous six months), and  
100 the Portuguese version for the HIV Treatment Satisfaction Questionnaires version "c"  
101 (HIVTSQc), six months after starting the use of Biktarvy® monthly blisters. HIVTSQs and  
102 HIVTSQc have been developed by Woodcock & Bradley, with evidence of sound

103 psychometric properties<sup>8,9</sup>. The HIVTSQs is composed of 10 items being answered in a  
104 seven-points Likert-type scale (varying from 0 = “very dissatisfied” to 6 = “very satisfied”).  
105 The HIVTSQs provides a global score of satisfaction as well as scores for two  
106 subdimensions: the HIVTSQs General Satisfaction/Clinical subscale and the HIVTSQs  
107 Lifestyle/Ease subscale; the HIVTSQc also includes a subscale: the HIVTSQc General  
108 Satisfaction/Clinical subscale.

109 Additionally, and for a better understanding of the factors of satisfaction with ART, patients  
110 were asked about their level of agreement with four statements, both at baseline and at  
111 follow-up: *The packaging of this medication allows me to easily check if I've taken my daily*  
112 *pill, This medicine comes in a package that lets me take the pill easily and*

113 *without anyone noticing, This medicine's packaging reminds me that I need to refill my*  
114 *prescription, and I don't like the way this medicine is packaged.* Finally, patients reported  
115 their level of agreement with one more statement, at the follow-up moment: *I am more*  
116 *satisfied with this type of medication packaging than with the previous one, which was a*  
117 *plastic bottle.* Level of agreement was indicated through a 5-points Likert scale ranging  
118 from 1 = *totally disagree* to 5 = *totally agree*.

119 To assess the impact of the new Biktarvy® packaging on adherence, pharmacy medication  
120 dispensing was measured, more specifically, by registering the number of tablets supplied  
121 in the last delivery per number of days elapsed since the last delivery. Pharmacy medication  
122 dispensing data were collected by pharmacy records, and questionnaires were completed  
123 while patients waited in the hospital pharmacy (a representation of the study design is  
124 presented in Figure 1).

125

## 126 **Figure 1. Study design diagram**

127

### 128 **Data analysis**

129 The statistical analyses were conducted using R statistical software version 4.2.1.  
130 Descriptive statistics were used to analyze results: percentages and absolute frequencies to  
131 describe the categorical variables; minimum, maximum, interquartile range, means,  
132 medians, and standard deviation for the quantitative variables.

133 All ten items from HIVTSQs were summed up to obtain a treatment satisfaction score (0 to  
134 60), where higher scores represent greater satisfaction. The HIVTSQs General Satisfaction  
135 / Clinical subscale includes the items 1, 2, 3, 9 and 10 (range: 0 to 30), and the HIVTSQs  
136 Lifestyle/Ease subscale includes the remaining items, namely the items 4, 5, 6, 7 and 8  
137 (range: 0 to 30).

138 For the HIVTSQc, the sum of all items results in a treatment satisfaction (change) score  
139 (range: -30 to 30), where positive values are associated with improvement in satisfaction  
140 with treatment, the 0 score represents no change, and negative values indicate a  
141 deterioration in treatment satisfaction. For the HIVTSQc General Satisfaction / Clinical  
142 subscale and HIVTSQc Lifestyle/Ease subscale, the same items as in HIVTSQs subscales  
143 were included (range: -15 to 15). Cronbach alpha was used to assess internal consistency  
144 for both HIVTSQs and HIVTSQc, and correlations were applied to assess the convergent  
145 validity between these two scales.

146 To evaluate the effect of switching the medication from a standard pill bottle to a monthly  
147 blister in patient satisfaction, a unilateral Wilcoxon signed rank test was applied (alternative

148 hypothesis: pseudomedian > 0) to the score in the HIVTSQc scale and its subscales.  
 149 Differences between independent samples in the distribution of these scores was tested  
 150 using the Wilcoxon rank sum test.  
 151 Linear regression models have been performed to assess the predictive effect of baseline  
 152 satisfaction on satisfaction change. The scores for HIVTSQc scale, HIVTSQc General  
 153 Satisfaction subscale, HIVTSQs Clinical subscale, e HIVTSQc Lifestyle/Ease subscale  
 154 were found as very skewed (left-skewed distribution). Therefore, their values were shifted  
 155 and reversed for modeling purposes, as follows: *HIVTSQc scale* recoded = 61 + 1 -  
 156 (*HIVTSQc scale* + 31); *HIVTSQc General Satisfaction / Clinical subscale* recoded = 31  
 157 + 1 - (*HIVTSQc General Satisfaction / Clinical subscale* + 16); *HIVTSQc Lifestyle/Ease*  
 158 *subscale* recoded = 31 + 1 - (*HIVTSQc Lifestyle/Ease subscale* + 16). Resulting scores were  
 159 log-transformed and included in the linear regression models as dependent variables. The  
 160 models included as predictors sex, age group, education, nationality, and antiretroviral  
 161 therapy duration, adjusting for the treatment satisfaction score at baseline. When studying  
 162 the predictive effect of treatment satisfaction at baseline (for HIVTSQs scale, HIVTSQs  
 163 General Satisfaction / Clinical subscale, and HIVTSQs Lifestyle/Ease subscale) on  
 164 HIVTSQc, HIVTSQc General Satisfaction / Clinical e HIVTSQc Lifestyle/Ease, simple  
 165 models (no additional variables, in these equations) have been used. The predictors  
 166 mentioned above were also included all-together in one model (M2). Estimates and 95%  
 167 confidence intervals (CI), and p-values are presented.  
 168  
 169

## 170 Results

171 One hundred and five PLHIV were enrolled in the study. Two were discontinued due to a  
 172 physician’s decision to switch ART, and one had not completed six months of using  
 173 Biktarvy® in blisters by the end of the data collection process (therefore, not considered for  
 174 assessing satisfaction with the blister packaging). Table 1 summarizes the demographic and  
 175 clinical characteristics of participants at baseline.  
 176

177 **Table 1. Sociodemographic and clinical characteristics of the participants**

| Sociodemographic variables |                           |                      |
|----------------------------|---------------------------|----------------------|
|                            | n                         | 105                  |
| Sex, n (%)                 | Female, n (%)             | 22 (21.0)            |
|                            | Male, n (%)               | 83 (79.1)            |
|                            | n                         | 105                  |
| Age                        | Mean                      | 43.35                |
|                            | SD                        | 11.69                |
|                            | Mediana [Q1, Q3]          | 42.00 (34.00, 53.00) |
|                            | Minimum                   | 21                   |
|                            | Maximum                   | 79                   |
|                            | n                         | 105                  |
| Scholarship level, n (%)   | No formal education       | 2 (1.9)              |
|                            | Primary (basic) education | 27 (25.7)            |
|                            | Secondary education       | 37 (35.2)            |
|                            | Superior education        | 39 (37.1)            |
|                            | n                         | 105                  |
| Nationality, n (%)         | Portuguese                | 59 (56.20)           |

|                                        | Non-Portuguese                  | 46 (43.8) |
|----------------------------------------|---------------------------------|-----------|
| <hr/>                                  |                                 |           |
| Clinical variables                     |                                 |           |
|                                        | n                               | 105       |
| Antiretroviral therapy duration, n (%) | Less than 1 year                | 2 (1.9)   |
|                                        | 1 - 5 years                     | 53 (50.5) |
|                                        | 6 - 10 years                    | 14 (13.3) |
|                                        | More than 10 years              | 36 (34.3) |
| <hr/>                                  |                                 |           |
| HIV viral load, n (%)                  | n                               | 105       |
|                                        | Not detectable                  | 83 (79.0) |
|                                        | 20 - 200 copies/mL              | 21 (20.0) |
|                                        | 201 - 1000 copies/mL            | 1 (1.0)   |
| <hr/>                                  |                                 |           |
| CD4 T lymphocytes count, n (%)         | n                               | 105       |
|                                        | < 350 cells/mm <sup>3</sup>     | 6 (5.7)   |
|                                        | 351 - 500 cells/mm <sup>3</sup> | 15 (14.3) |
|                                        | > 500 cells/mm <sup>3</sup>     | 84 (80.0) |

178 n: number of subjects; HIV: human immunodeficiency virus

179

180 Out of the 105 participants, twenty-one (21.0%) were females. The mean age was 43.35  
 181 years (s.d: 11.69; min 21, max 79 years old), 35.2% and 37.1% had secondary and superior  
 182 education, respectively, and 43.8% were born outside Portugal. Only two participants had  
 183 been following ART for less than one year. 79.0% had a non-detectable viral load, and  
 184 80.0% had a CD4T lymphocyte count higher than 500 cells/mm<sup>3</sup>.

185 The scales used for assessing satisfaction performed well psychometrically: the internal  
 186 reliability coefficients for HIVTSQs and HIVTSQc were found to be good (alpha = .76 for  
 187 HIVTSQs; alpha = .88 for HIVTSQc). The correlation between HIVTSQs and HIVTSQc  
 188 was also significant (rho=.327) (Figure 2).

189 **Figure 2. HIVTSQs (and subscales) and HIVTSQc total scores correlations**  
 190 **(Spearman correlation)**

191

192 As Table 2 shows, the scores of HIVTSQs (at baseline) were not found to be associated  
 193 with sociodemographic variables or the selected clinical indicators. When considering the 6-  
 194 month assessment (with blister package usage) with HIVTSQc, a significant positive  
 195 satisfaction evolution was observed (also for the HIVTSQc subscale).

**Table 197. Satisfaction (HIVTSQs and HIVTSQc scores) by sex, age group, education, nationality, and antiretroviral therapy duration**

|                                                         | TOTAL <sup>1</sup>   |                | Sex <sup>2</sup>     |                      | Age group <sup>2</sup> |                                 |                               | Education <sup>2</sup> |                                             |                                 | Nationality <sup>2</sup> |                      |                              | Antiretroviral therapy duration <sup>2</sup> |                            |                              |                |
|---------------------------------------------------------|----------------------|----------------|----------------------|----------------------|------------------------|---------------------------------|-------------------------------|------------------------|---------------------------------------------|---------------------------------|--------------------------|----------------------|------------------------------|----------------------------------------------|----------------------------|------------------------------|----------------|
|                                                         | N = 105              | p <sup>1</sup> | Female<br>n = 22     | Male<br>n = 83       | p <sup>2</sup>         | Less than 50<br>years<br>n = 69 | 50 years or<br>more<br>n = 36 | p <sup>2</sup>         | Secondary<br>education or<br>less<br>n = 66 | Superior<br>education<br>n = 39 | p <sup>2</sup>           | Portuguese<br>n = 59 | Non-<br>Portuguese<br>n = 46 | p <sup>2</sup>                               | Up to 5<br>years<br>n = 55 | 6 years or<br>more<br>n = 50 | p <sup>2</sup> |
| <b>HIVTSQs scale</b>                                    |                      |                |                      |                      |                        |                                 |                               |                        |                                             |                                 |                          |                      |                              |                                              |                            |                              |                |
| Mean (SD)                                               | 54.69 (5.52)         |                | 55.05 (6.37)         | 54.59 (5.31)         |                        | 54.83 (5.82)                    | 54.42 (4.96)                  |                        | 54.64 (6.10)                                | 54.77 (4.46)                    |                          | 53.90 (5.70)         | 55.70 (5.18)                 |                                              | 54.25 (4.99)               | 55.16 (6.07)                 |                |
| Median [Q1, Q3]                                         | 57.00 (51.00, 59.00) | (a)            | 57.50 (53.50, 59.75) | 57.00 (51.00, 59.00) | 0.500                  | 57.00 (51.00, 60.00)            | 56.00 (51.00, 58.00)          | 0.361                  | 57.00 (50.25, 59.00)                        | 56.00 (51.00, 59.00)            | 0.705                    | 56.00 (50.00, 59.00) | 57.00 (54.00, 60.00)         | 0.085                                        | 56.00 (50.00, 59.00)       | 57.00 (53.25, 60.00)         | 0.191          |
| Minimum - Maximum                                       | 37.00 - 60.00        |                | 37.00 - 60.00        | 38.00 - 60.00        |                        | 37.00 - 60.00                   | 42.00 - 60.00                 |                        | 37.00 - 60.00                               | 47.00 - 60.00                   |                          | 37.00 - 60.00        | 38.00 - 60.00                |                                              | 43.00 - 60.00              | 37.00 - 60.00                |                |
| <b>HIVTSQs General Satisfaction / Clinical subscale</b> |                      |                |                      |                      |                        |                                 |                               |                        |                                             |                                 |                          |                      |                              |                                              |                            |                              |                |
| Mean (SD)                                               | 27.78 (2.61)         |                | 27.59 (2.84)         | 27.83 (2.56)         |                        | 28.07 (2.48)                    | 27.22 (2.78)                  |                        | 27.68 (2.81)                                | 27.95 (2.25)                    |                          | 27.31 (2.81)         | 28.39 (2.20)                 |                                              | 27.71 (2.38)               | 27.86 (2.86)                 |                |
| Median [Q1, Q3]                                         | 29.00 (26.00, 30.00) | (a)            | 28.50 (24.75, 30.00) | 29.00 (26.50, 30.00) | 0.844                  | 29.00 (27.00, 30.00)            | 28.00 (25.00, 30.00)          | 0.116                  | 28.50 (27.00, 30.00)                        | 29.00 (26.00, 30.00)            | 0.899                    | 28.00 (25.00, 30.00) | 29.00 (28.00, 30.00)         | 0.098                                        | 28.00 (27.00, 30.00)       | 29.50 (26.00, 30.00)         | 0.292          |
| Minimum - Maximum                                       | 20.00 - 30.00        |                | 22.00 - 30.00        | 20.00 - 30.00        |                        | 20.00 - 30.00                   | 21.00 - 30.00                 |                        | 20.00 - 30.00                               | 23.00 - 30.00                   |                          | 21.00 - 30.00        | 20.00 - 30.00                |                                              | 23.00 - 30.00              | 20.00 - 30.00                |                |
| <b>HIVTSQs Lifestyle/Ease subscale</b>                  |                      |                |                      |                      |                        |                                 |                               |                        |                                             |                                 |                          |                      |                              |                                              |                            |                              |                |
| Mean (SD)                                               | 26.90 (3.52)         |                | 27.45 (4.07)         | 26.76 (3.37)         |                        | 26.75 (3.76)                    | 27.19 (3.03)                  |                        | 26.95 (3.86)                                | 26.82 (2.88)                    |                          | 26.59 (3.37)         | 27.30 (3.69)                 |                                              | 26.55 (3.33)               | 27.30 (3.70)                 |                |
| Median [Q1, Q3]                                         | 28.00 (25.00, 30.00) | (a)            | 29.00 (28.00, 30.00) | 28.00 (25.00, 30.00) | 0.199                  | 28.00 (25.00, 30.00)            | 28.00 (25.00, 30.00)          | 0.890                  | 28.50 (25.00, 30.00)                        | 27.00 (25.00, 30.00)            | 0.508                    | 28.00 (25.00, 29.00) | 29.00 (26.25, 30.00)         | 0.074                                        | 27.00 (25.00, 30.00)       | 28.50 (27.00, 30.00)         | 0.145          |
| Minimum - Maximum                                       | 15.00 - 30.00        |                | 15.00 - 30.00        | 17.00 - 30.00        |                        | 15.00 - 30.00                   | 20.00 - 30.00                 |                        | 15.00 - 30.00                               | 20.00 - 30.00                   |                          | 15.00 - 30.00        | 17.00 - 30.00                |                                              | 17.00 - 30.00              | 15.00 - 30.00                |                |
| <b>HIVTSQc scale</b>                                    |                      |                |                      |                      |                        |                                 |                               |                        |                                             |                                 |                          |                      |                              |                                              |                            |                              |                |
| Mean (SD)                                               | 22.21 (9.14)         |                | 22.05 (10.27)        | 22.24 (8.93)         |                        | 23.07 (7.96)                    | 20.54 (10.99)                 |                        | 21.59 (9.00)                                | 23.21 (9.40)                    |                          | 21.19 (10.23)        | 23.49 (7.46)                 |                                              | 22.85 (8.06)               | 21.45 (10.31)                |                |
| Median [Q1, Q3]                                         | 25.50 (18.25, 29.00) | < 0.001        | 26.00 (19.00, 28.50) | 25.00 (18.50, 29.00) | 0.853                  | 26.00 (19.50, 28.50)            | 25.00 (18.00, 29.00)          | 0.474                  | 25.00 (18.00, 28.00)                        | 28.00 (22.00, 29.50)            | 0.133                    | 25.00 (18.00, 28.00) | 26.00 (19.00, 29.00)         | 0.368                                        | 26.00 (19.00, 29.00)       | 25.00 (18.50, 28.00)         | 0.615          |
| Minimum - Maximum                                       | -9 - 30              |                | -6 - 30              | -9 - 30              |                        | -6 - 30                         | -9 - 30                       |                        | -6 - 30                                     | -9 - 30                         |                          | -9 - 30              | 0 - 30                       |                                              | 0 - 30                     | -9 - 30                      |                |
| (NA)                                                    | 3                    |                | 3                    | 0                    |                        | 2                               | 1                             |                        | 3                                           | 0                               |                          | 2                    | 1                            |                                              | 0                          | 3                            |                |
| <b>HIVTSQc General Satisfaction / Clinical subscale</b> |                      |                |                      |                      |                        |                                 |                               |                        |                                             |                                 |                          |                      |                              |                                              |                            |                              |                |
| Mean (SD)                                               | 11.37 (4.74)         |                | 12.00 (5.11)         | 11.23 (4.67)         |                        | 11.78 (4.21)                    | 10.60 (5.60)                  |                        | 11.21 (4.65)                                | 11.64 (4.93)                    |                          | 10.88 (5.10)         | 12.00 (4.20)                 |                                              | 11.60 (3.99)               | 11.11 (5.52)                 |                |
| Median [Q1, Q3]                                         | 13.00 (10.00, 15.00) | < 0.001        | 14.00 (12.00, 15.00) | 13.00 (10.00, 15.00) | 0.299                  | 13.00 (10.50, 15.00)            | 12.00 (9.00, 15.00)           | 0.611                  | 12.00 (10.00, 15.00)                        | 14.00 (11.00, 15.00)            | 0.397                    | 12.00 (9.00, 15.00)  | 14.00 (10.00, 15.00)         | 0.178                                        | 13.00 (10.50, 15.00)       | 14.00 (9.50, 15.00)          | 0.516          |
| Minimum - Maximum                                       | -3 - 15              |                | -3 - 15              | -3 - 15              |                        | -3 - 15                         | -3 - 15                       |                        | -3 - 15                                     | -3 - 15                         |                          | -3 - 15              | 0 - 15                       |                                              | 0 - 15                     | -3 - 15                      |                |
| (NA)                                                    | 3                    |                | 3                    | 0                    |                        | 2                               | 1                             |                        | 3                                           | 0                               |                          | 2                    | 1                            |                                              | 0                          | 3                            |                |
| <b>HIVTSQc Lifestyle/Ease subscale</b>                  |                      |                |                      |                      |                        |                                 |                               |                        |                                             |                                 |                          |                      |                              |                                              |                            |                              |                |
| Mean (SD)                                               | 10.83 (4.97)         |                | 10.05 (6.11)         | 11.01 (4.69)         |                        | 11.30 (4.53)                    | 9.94 (5.68)                   |                        | 10.38 (4.96)                                | 11.56 (4.96)                    |                          | 10.32 (5.35)         | 11.49 (4.41)                 |                                              | 11.25 (4.33)               | 10.34 (5.63)                 |                |
| Median [Q1, Q3]                                         | 13.00 (9.00, 15.00)  | < 0.001        | 13.00 (8.50, 14.00)  | 13.00 (9.00, 15.00)  | 0.621                  | 13.00 (9.00, 15.00)             | 12.00 (8.50, 14.00)           | 0.262                  | 12.00 (9.00, 14.00)                         | 14.00 (9.50, 15.00)             | 0.094                    | 12.00 (9.00, 15.00)  | 13.00 (9.00, 15.00)          | 0.375                                        | 13.00 (9.00, 15.00)        | 12.00 (9.00, 14.50)          | 0.501          |
| Minimum - Maximum                                       | -6 - 15              |                | -3 - 15              | -6 - 15              |                        | -3 - 15                         | -6 - 15                       |                        | -3 - 15                                     | -6 - 15                         |                          | -6 - 15              | -3 - 15                      |                                              | -2 - 15                    | -6 - 15                      |                |
| (NA)                                                    | 3                    |                | 3                    | 0                    |                        | 2                               | 1                             |                        | 3                                           | 0                               |                          | 2                    | 1                            |                                              | 0                          | 3                            |                |

SD, Standard Deviation; Q1, Quartile 1; Q3, Quartile 3

<sup>1</sup> Wilcoxon signed rank test for one sample;

<sup>2</sup> Wilcoxon rank sum test for two independent samples

(a) Test was not performed for HIVTSQs and respective subscales

(NA) Number of patients for whom no data was available

203 Table 3 also shows that satisfaction with a blister (measured with HIVTSQc) is not  
204 predicted by gender, age group, education level, nationality, or ART duration. On the other  
205 hand, an increase in the baseline treatment satisfaction score was associated with a decrease  
206 in the treatment satisfaction change score (six months after the switch to blister). For the  
207 HIVTSQc scale model, a one-unit increase in the baseline treatment satisfaction score  
208 (HIVTSQs) results in a decrease of 6% [ $\exp(0.06)$ ] in the HIVTSQc overall score.  
209



210 **Table 3. Satisfaction change (HIVTSQc scores): predictive effect of satisfaction at baseline (HIVTSQs), sociodemographic variables,**  
 211 **and clinical variables (linear models)**

|                                        | HIVTSQc scale        |              |                      |              | HIVTSQc General Satisfaction / Clinical subscale |              |                      |              | HIVTSQc Lifestyle/Ease subscale |              |                      |                  |
|----------------------------------------|----------------------|--------------|----------------------|--------------|--------------------------------------------------|--------------|----------------------|--------------|---------------------------------|--------------|----------------------|------------------|
|                                        | Model 1              |              | Model 2              |              | Model 1                                          |              | Model 2              |              | Model 1                         |              | Model 2              |                  |
|                                        | b (95% CI)           | p            | b (95% CI)           | p            | b (95% CI)                                       | p            | b (95% CI)           | p            | b (95% CI)                      | p            | b (95% CI)           | p                |
| <b>HIVTSQs*</b>                        | -0.06 (-0.10; -0.02) | <b>0.002</b> | -0.06 (-0.10; -0.02) | <b>0.003</b> | -0.10 (-0.17; -0.03)                             | <b>0.006</b> | -0.09 (-0.17; -0.02) | <b>0.016</b> | -0.09 (-0.15; -0.04)            | <b>0.001</b> | -0.10 (-0.15; -0.04) | <b>&lt;0.001</b> |
| <b>Sex</b>                             |                      |              |                      |              |                                                  |              |                      |              |                                 |              |                      |                  |
| Female                                 | —                    |              | —                    |              | —                                                |              | —                    |              | —                               |              | —                    |                  |
| Male                                   | -0.03 (-0.56; 0.51)  | 0.926        | 0.08 (-0.47; 0.64)   | 0.769        | 0.27 (-0.20; 0.74)                               | 0.252        | 0.29 (-0.20; 0.78)   | 0.240        | -0.25 (-0.73; 0.23)             | 0.302        | -0.14 (-0.64; 0.35)  | 0.559            |
| <b>Age group</b>                       |                      |              |                      |              |                                                  |              |                      |              |                                 |              |                      |                  |
| Less than 50 years                     | —                    |              | —                    |              | —                                                |              | —                    |              | —                               |              | —                    |                  |
| 50 years or more                       | 0.12 (-0.32; 0.56)   | 0.591        | 0.03 (-0.44; 0.49)   | 0.913        | 0.02 (-0.37; 0.41)                               | 0.918        | 0.02 (-0.39; 0.44)   | 0.914        | 0.26 (-0.12; 0.65)              | 0.178        | 0.17 (-0.23; 0.57)   | 0.409            |
| <b>Education</b>                       |                      |              |                      |              |                                                  |              |                      |              |                                 |              |                      |                  |
| Secondary education or less            | —                    |              | —                    |              | —                                                |              | —                    |              | —                               |              | —                    |                  |
| Superior education                     | -0.34 (-0.76; 0.08)  | 0.114        | -0.31 (-0.76; 0.15)  | 0.183        | -0.13 (-0.51; 0.25)                              | 0.498        | -0.17 (-0.57; 0.23)  | 0.390        | -0.36 (-0.73; 0.01)             | 0.060        | -0.27 (-0.67; 0.12)  | 0.174            |
| <b>Nationality</b>                     |                      |              |                      |              |                                                  |              |                      |              |                                 |              |                      |                  |
| Portuguese                             | —                    |              | —                    |              | —                                                |              | —                    |              | —                               |              | —                    |                  |
| Non-Portuguese                         | -0.10 (-0.52; 0.33)  | 0.655        | -0.07 (-0.50; 0.35)  | 0.735        | -0.16 (-0.54; 0.21)                              | 0.388        | -0.16 (-0.54; 0.23)  | 0.420        | -0.15 (-0.52; 0.23)             | 0.435        | -0.11 (-0.49; 0.26)  | 0.549            |
| <b>Antiretroviral therapy duration</b> |                      |              |                      |              |                                                  |              |                      |              |                                 |              |                      |                  |
| Up to 5 years                          | —                    |              | —                    |              | —                                                |              | —                    |              | —                               |              | —                    |                  |
| 6 years or more                        | 0.21 (-0.21; 0.62)   | 0.331        | 0.14 (-0.31; 0.59)   | 0.541        | -0.08 (-0.45; 0.29)                              | 0.670        | -0.08 (-0.48; 0.32)  | 0.705        | 0.24 (-0.13; 0.61)              | 0.207        | 0.11 (-0.28; 0.51)   | 0.574            |

212 CI, Confidence Interval

213 \* These coefficients report to scores in HIVTSQs scale, HIVTSQs General Satisfaction / Clinical subscale and HIVTSQs Lifestyle/Ease subscale in models for HIVTSQc scale, HIVTSQc  
 214 General Satisfaction / Clinical subscale and HIVTSQc Lifestyle/Ease subscale, respectively. For analysis, HIVTSQc scores were shifted, reversed and log transformed.

215 Model 1, Individual models adjusted for each variable presented, plus the HIVTSQs score

216 Model 2, Model adjusted for all the variables presented

218 This predictive value of baseline satisfaction (HIVTSQs) was also observed for the  
219 HIVTSQc subscale (general satisfaction/clinical subscale).

220 Plots in Figure 2 provide some insight into the facets of blister packaging, as perceived by  
221 patients (compared with bottles) that may support the observed positive evolution of  
222 satisfaction. Although no significant difference was found in the proportion of patients  
223 reporting appreciating positively the packaging (bottle and blister), three main facets of  
224 usage were found to be better considered by patients: a significantly higher proportion of  
225 them considered that the blister helps them to keep track of daily intake of pills; a higher  
226 proportion indicate that blister packaging usage is more discrete than bottle usage; and a  
227 higher proportion report that blister packaging helps them to recall the refill momentum.

228

229 **Figure 3. Frequencies of item response on the specifically developed questionnaire between**  
230 **packaging methods**

231

232 Overall, and as seen in Figure 3, 68.6% of patients report being more satisfied with the  
233 blister packaging than with bottle packaging.

234

235 **Figure 4. Response distribution on patients' satisfaction with blister packaging, when**  
236 **compared with bottle packaging**

237

238 Regarding adherence, no significant differences were observed between the standard pill  
239 bottle and monthly blister packaging: 89.7% and 91.3% of adherence, respectively.

240

## 241 **Discussion**

242 Main aim of this project was to assess if introducing a new packaging would affect  
243 satisfaction and adherence with ART. The study was planned as a two-center, observational  
244 retrospective and prospective study with 18+ years old PLHIV conducted in Portuguese  
245 hospitals (non-random sampling). The bottle effect was assessed retrospectively for at least  
246 six months, and the blister effect was prospectively evaluated for a period of at least six  
247 months of usage. Overall, 105 PLHIV were enrolled and 102 completed the prospective  
248 component of the study.

249 The main outcome of the study was satisfaction with ART treatment. Patients reported an  
250 increase in satisfaction with the Biktarvy® blister packaging (compared with previous bottle  
251 packaging). And this increase in satisfaction was independent of several main  
252 sociodemographic and clinical characteristics. Importantly, the patients who became more  
253 satisfied with ART treatment (when using blister packaging) were the least satisfied with  
254 bottle packaging.

255 Another main finding regards the perception of utility from the blister packaging: after a  
256 minimum of six month of experience, the blister (which includes a weekly calendar) was  
257 considered by the majority (85%) of patients as an effective tool to keep track of their daily  
258 intake of pills (significant higher percentage than the appreciation for bottle packaging),  
259 and about two third of patients considered that it is helpful as a reminder of the adequate  
260 moment of refilling.

261

## 262 **Conclusion**

263 To our knowledge this is the first study evaluating satisfaction with blister calendar package  
264 usage of ART by PLHIV, and the same for medication packaging in blister packs with a  
265 weekly calendar for the treatment of different diseases.

266 Overall, these findings support the advantages of the new packaging. Nevertheless,  
267 adherence was not found to be significantly higher for blister than for bottle packaging  
268 (though with a slight increase of proportion in adherence: 1.6 percentual points). This  
269 issue calls for future research, also because the lapse of time after introducing the new  
270 packaging was limited (about six months). Larger samples, including selected populations  
271 with more extended periods of blister utilization, may provide sounder evidence about the  
272 adherence potential of this Biktarvy® new packaging.

273

## 274 **Acknowledgments**

275 The authors thank the patients who accepted to participate in the study, Prof. Clare Bradley  
276 and Health Psychology Research Limited (HPR) for the HIVTSQs and HIVTSQc, and Ana  
277 Sequeira and Hugo Caldeira for technical assistance.

278

## 279 **Conflict of interests**

280 The authors declare no conflict of interest, except for Maria Pinto da Silva who is an  
281 employee of Gilead Sciences, Lda., Lisboa, Portugal, and owns shares in Gilead.

282

## 283 **Supporting information captions**

284 Figure 1. Study design diagram

285 Table 1. Sociodemographic and clinical characteristics of the participants

286 Figure 2. HIVTSQs (and subscales) and HIVTSQc total scores correlations (Spearman  
287 correlation)

288 Table 2. Satisfaction (HIVTSQs and HIVTSQc scores) by sex, age group, education,  
289 nationality, and antiretroviral therapy duration

290 Table 3. Satisfaction change (HIVTSQc scores): predictive effect of satisfaction at baseline  
291 (HIVTSQs), sociodemographic variables, and clinical variables (linear models)

292 Figure 3. Frequencies of item response on the specifically developed questionnaire between  
293 packaging methods

294 Figure 4. Response distribution on patients' satisfaction with blister packaging, when  
295 compared with bottle packaging

296

## 297 **References**

298

- 299 1. EACS Guidelines version 12.0, October 2023.
- 300 2. Paramesha AE, Chacko LK. Predictors of adherence to antiretroviral therapy among  
301 PLHIV. *Indian J Public Health*. 2019;63(4):367-76.
- 302 3. Wohl D, Clarke A, Maggiolo F, Garner W, Laouri M, Martin H, Quirk E. Patient-  
303 reported symptoms over 48 weeks among participants in randomized, double-blind,  
304 phase III non-inferiority trials of adults with HIV on co-formulated bicitgravir,  
305 emtricitabine, and tenofovir alafenamide versus co-formulated abacavir,  
306 dolutegravir, and lamivudine. *Patient*. 2018;11(5):561-73.
- 307 4. Curran A, Arends J, Buhk T, Cascio M, Teofilo E, van den Berk G, Guaraldi G.  
308 "Moving Fourth": Introduction of a practical toolkit for shared decision-making to  
309 facilitate healthy living beyond HIV viral suppression. *AIDS Rev*. 2021;23(4):204-  
310 13.
- 311 5. Schneider PJ, Murphy JE, Pedersen CA. Impact of medication packaging on  
312 adherence and treatment outcomes in older ambulatory patients. *J Am Pharm Assoc*  
313 (2003). 2008;48(1):58-63.
- 314 6. Conn VS, Ruppap TM, Chan KC, Dunbar-Jacob J, Pepper GA, De Geest S.  
315 Packaging interventions to increase medication adherence: systematic review and  
316 meta-analysis. *Curr Med Res Opin*. 2015;31(1):145-60.

- 317 7. Biktarvy Summary of Product Characteristics, May 2021.  
318 8. Woodcock A, Bradley C. Validation of the revised 10-item HIV Treatment  
319 Satisfaction Questionnaire status version and new change version. *Value Health*.  
320 2006;9(5): 320-33.  
321 9. Serrão R, Mansinho K, Maltez F, Marques N, Carvalho A, Pazos R, et al. Real-  
322 World characterization of the portuguese population living with HIV who initiated  
323 raltegravir based-regimens: The REALITY Study. *Acta Med Port*. 2022;35(7-  
324 8):558-65.

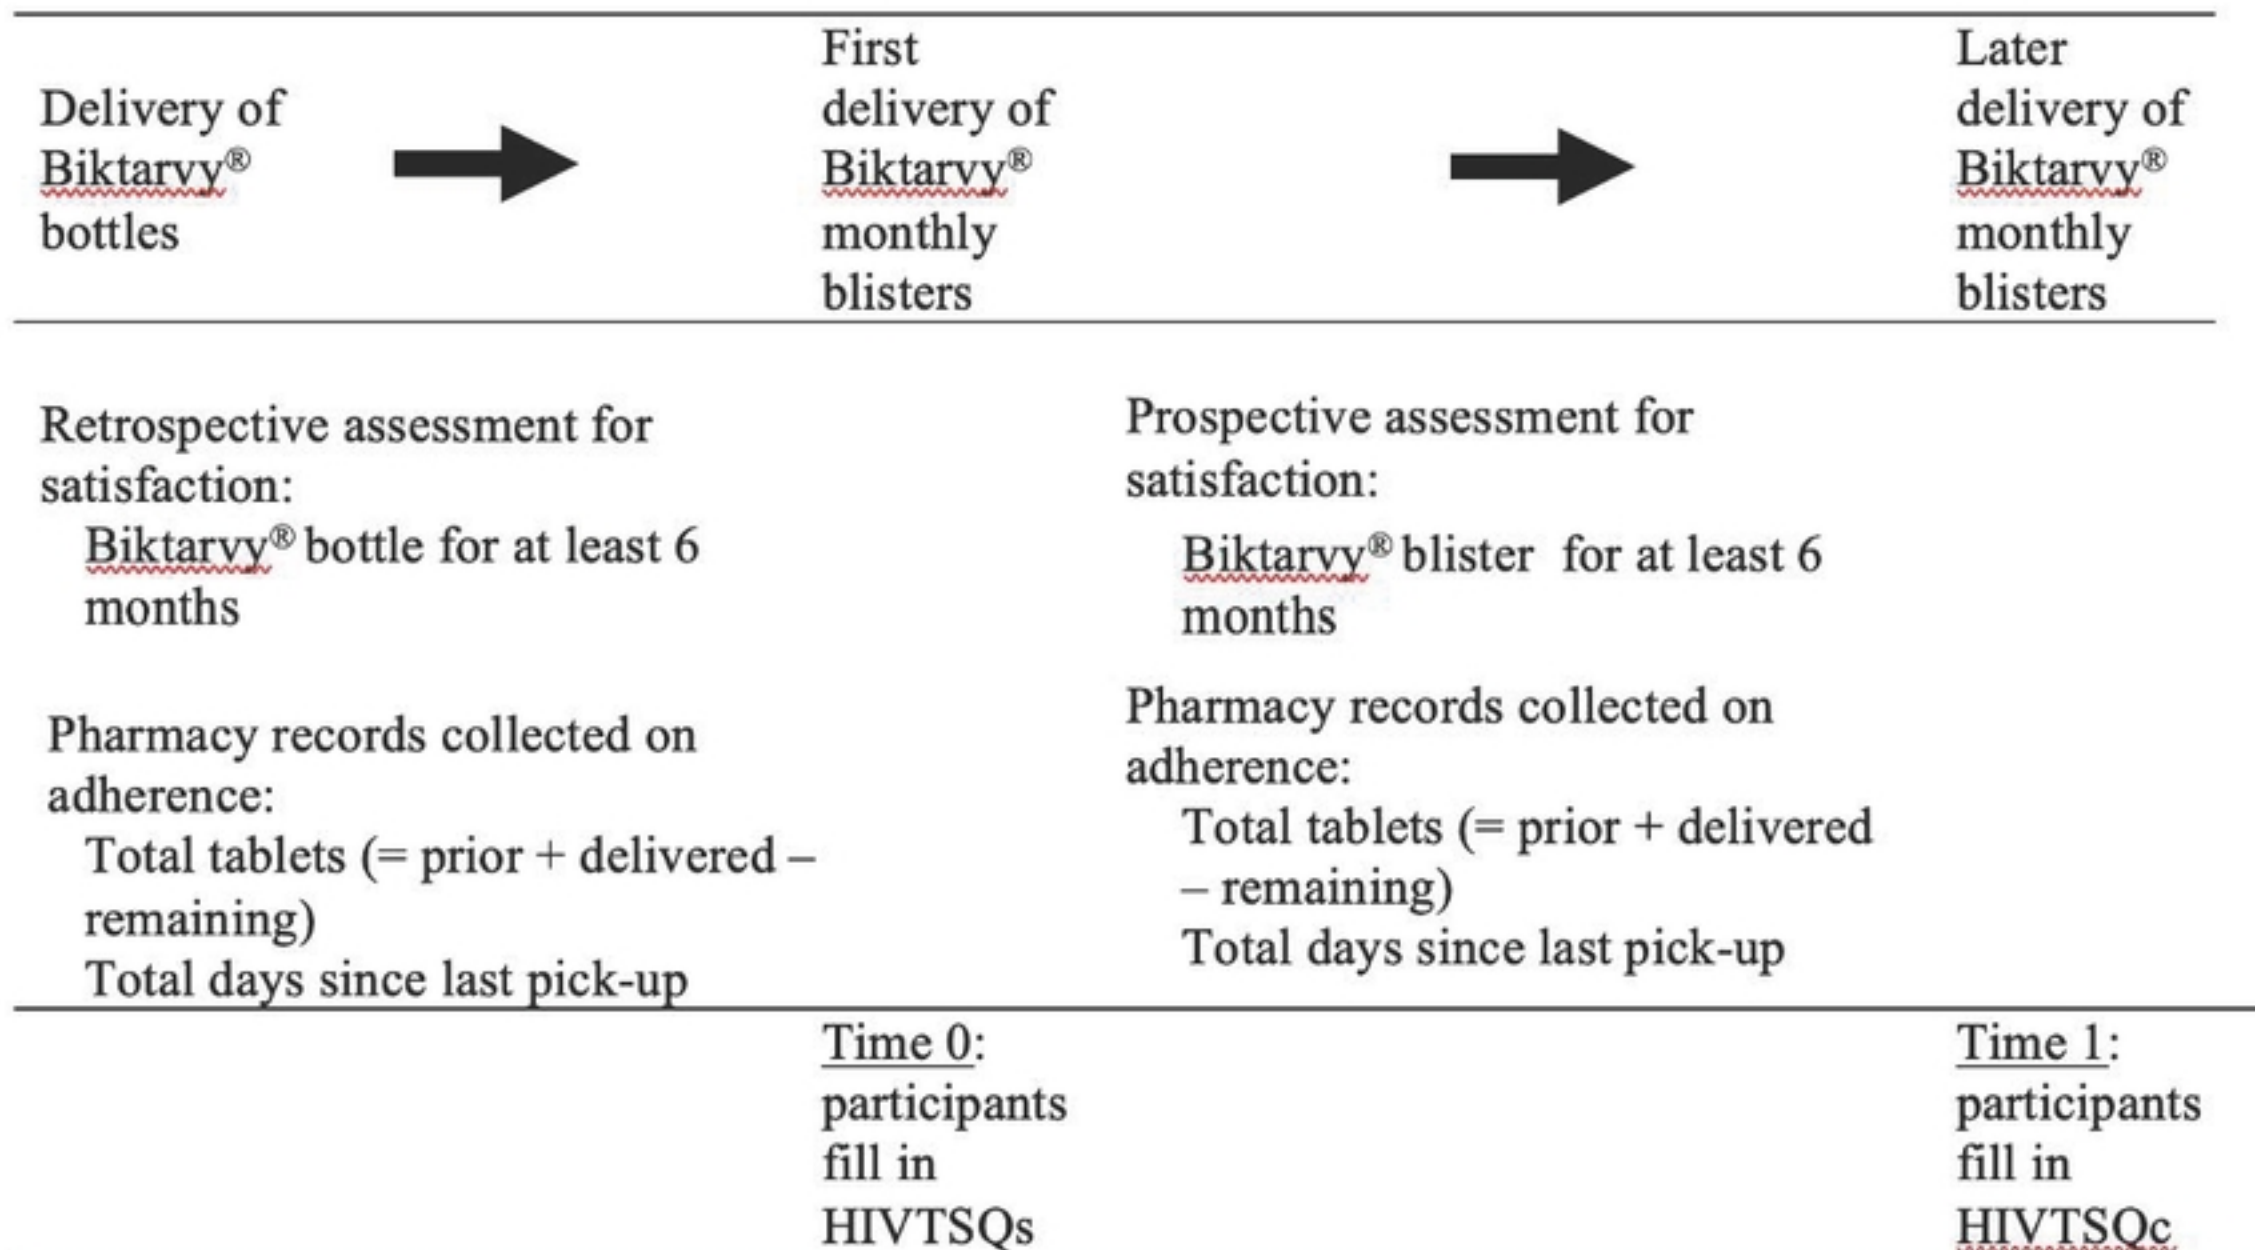

Figure 1

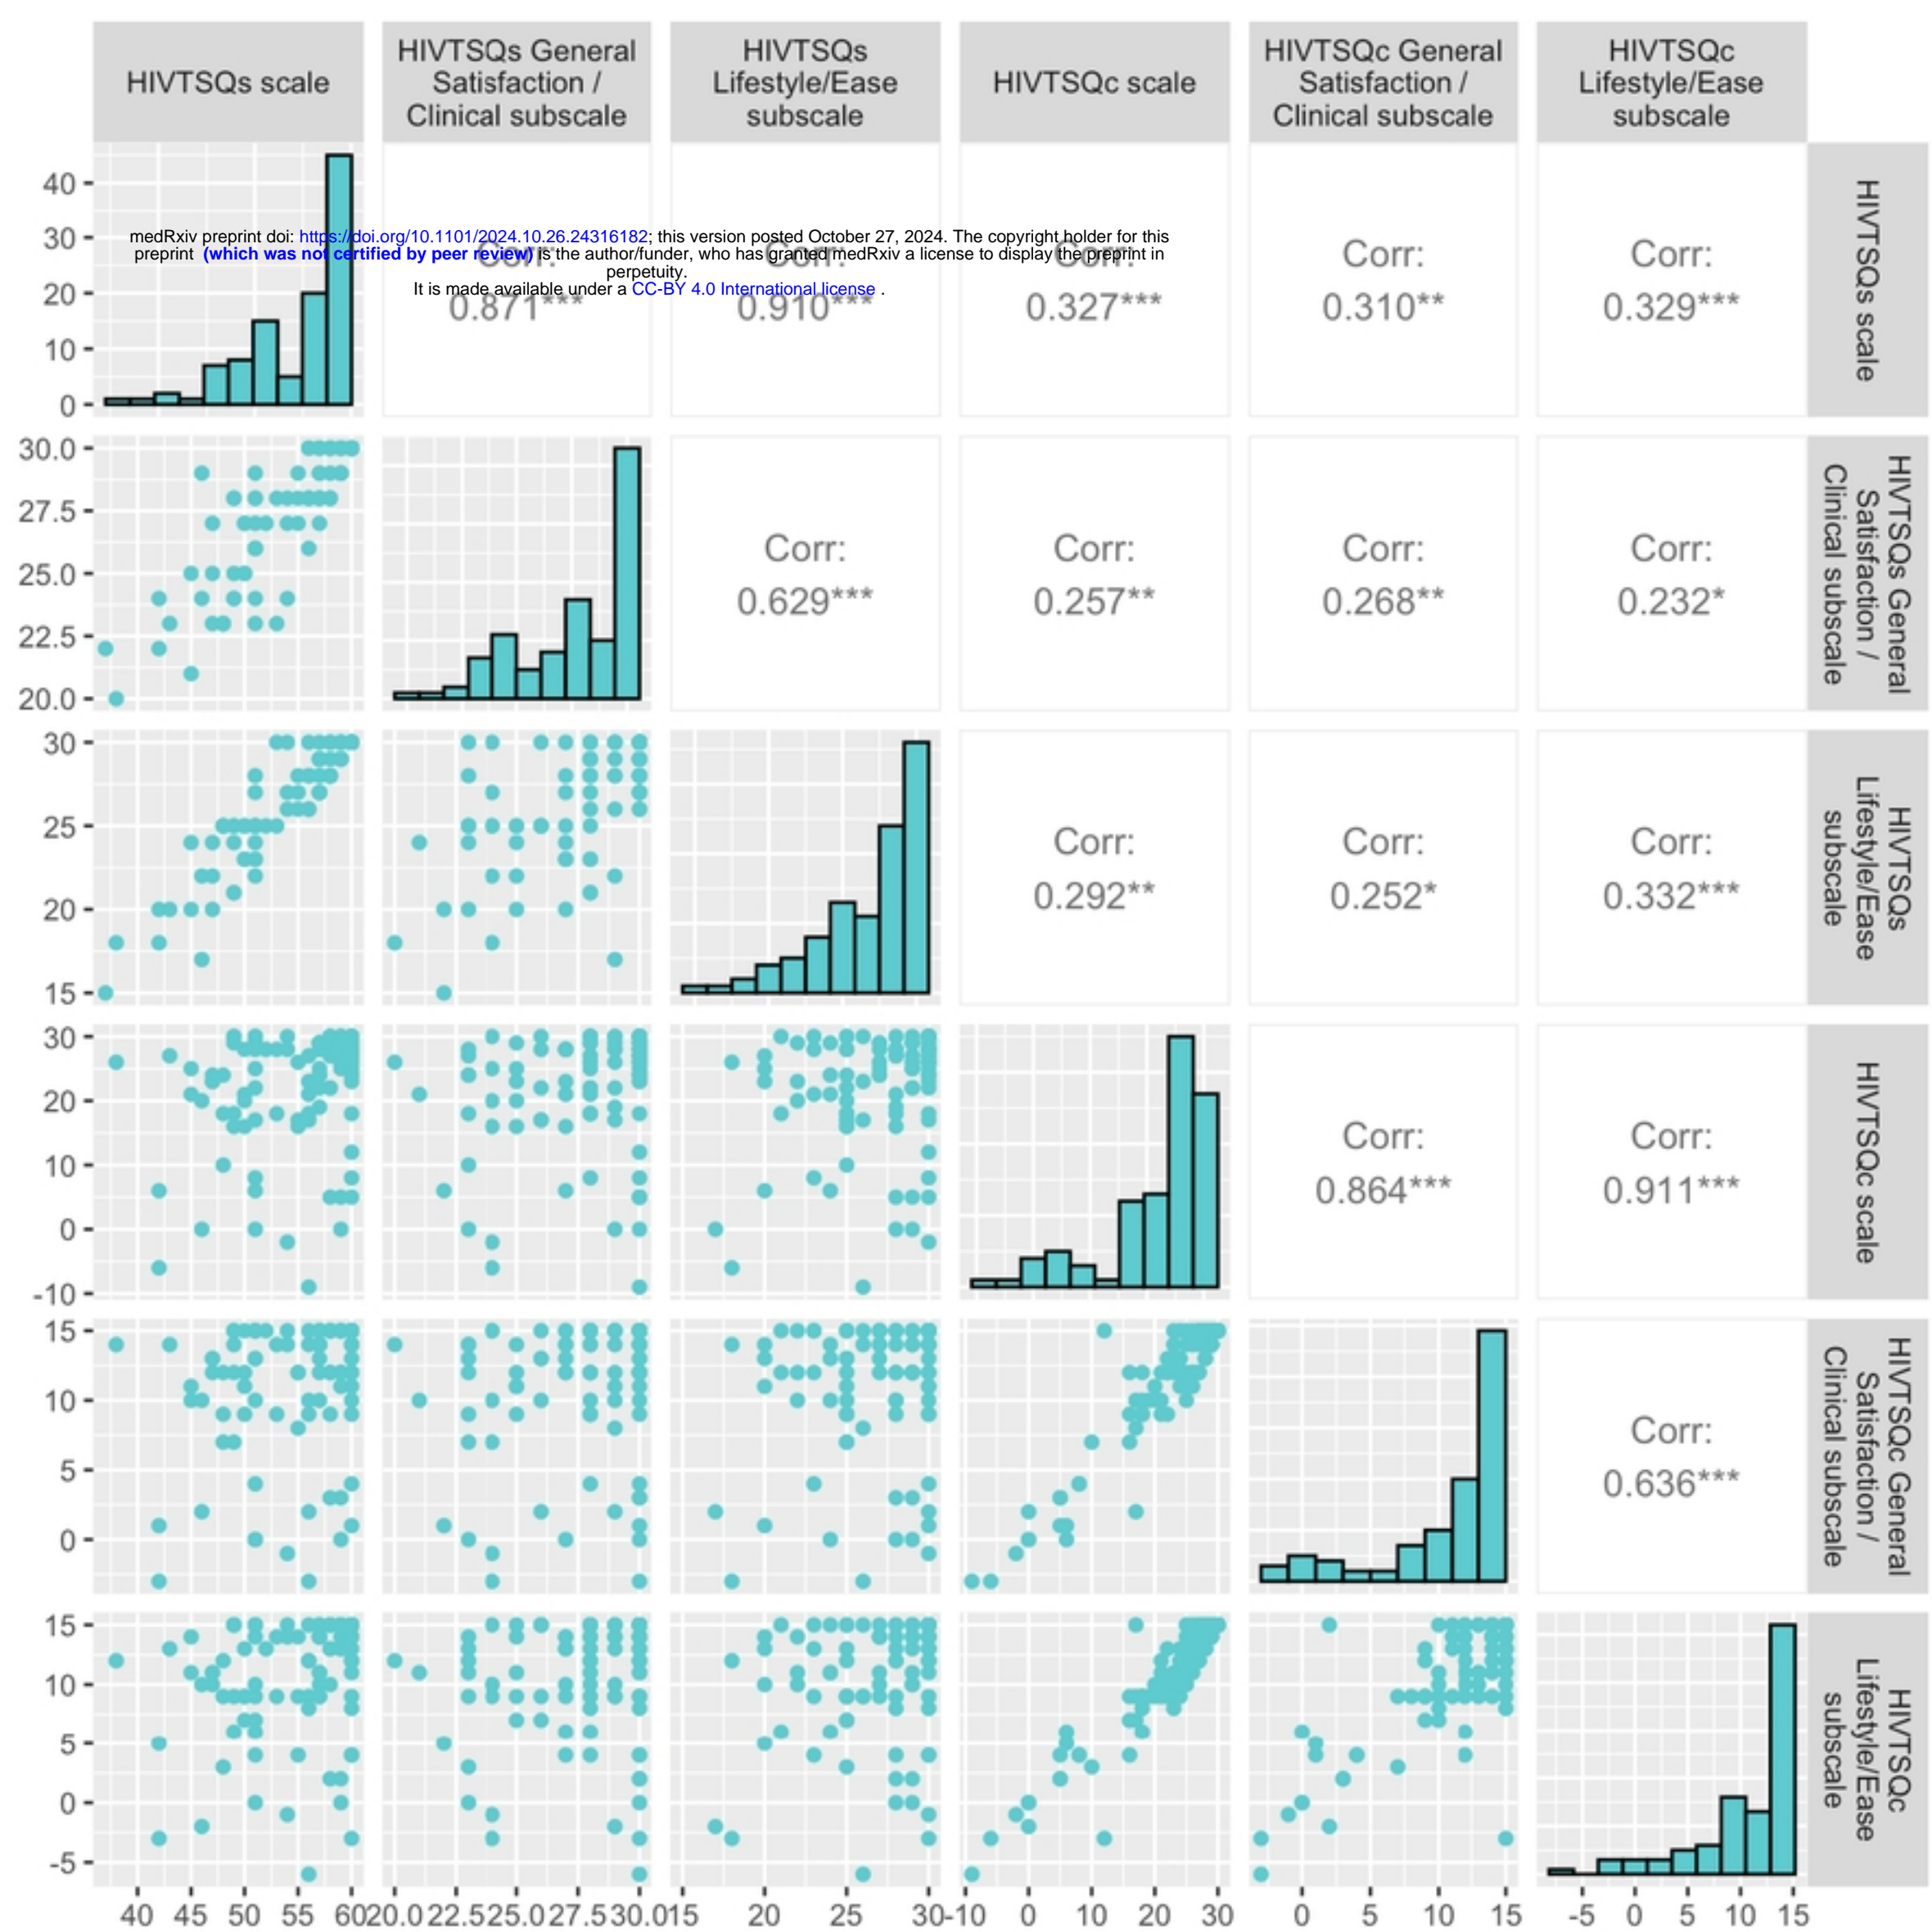

Figure 2

**This packaging allows me to easily check if I've taken my daily pill**

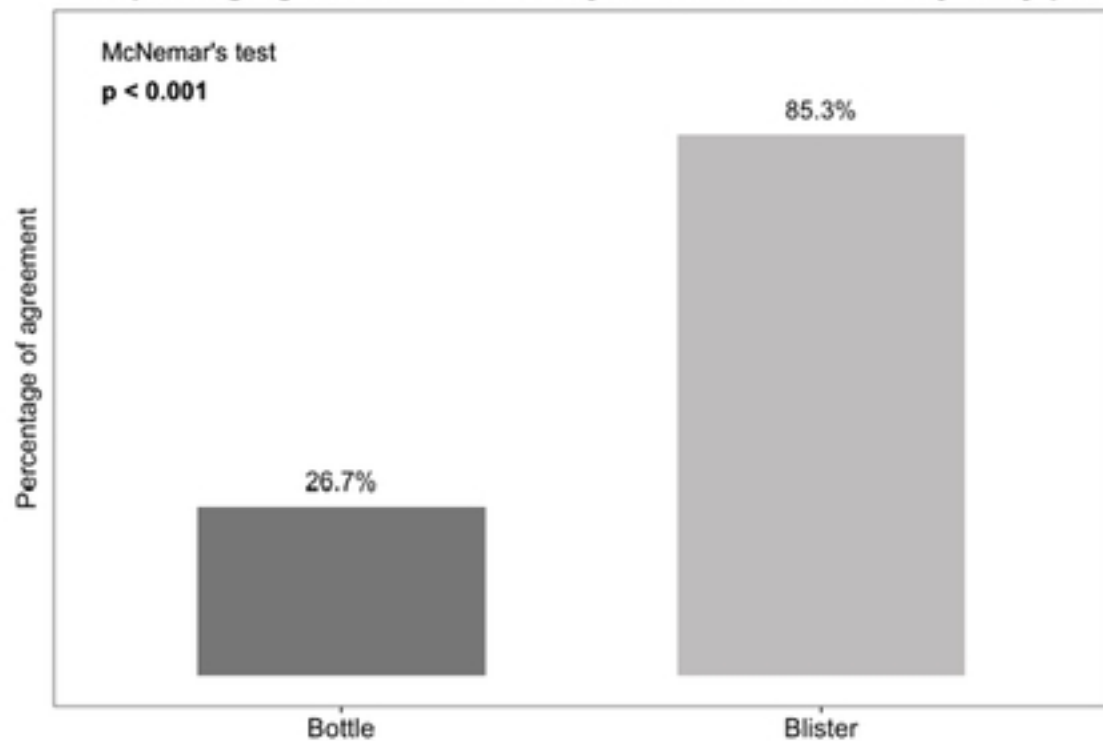

**This packaging lets me take the pill easily and discreetly**

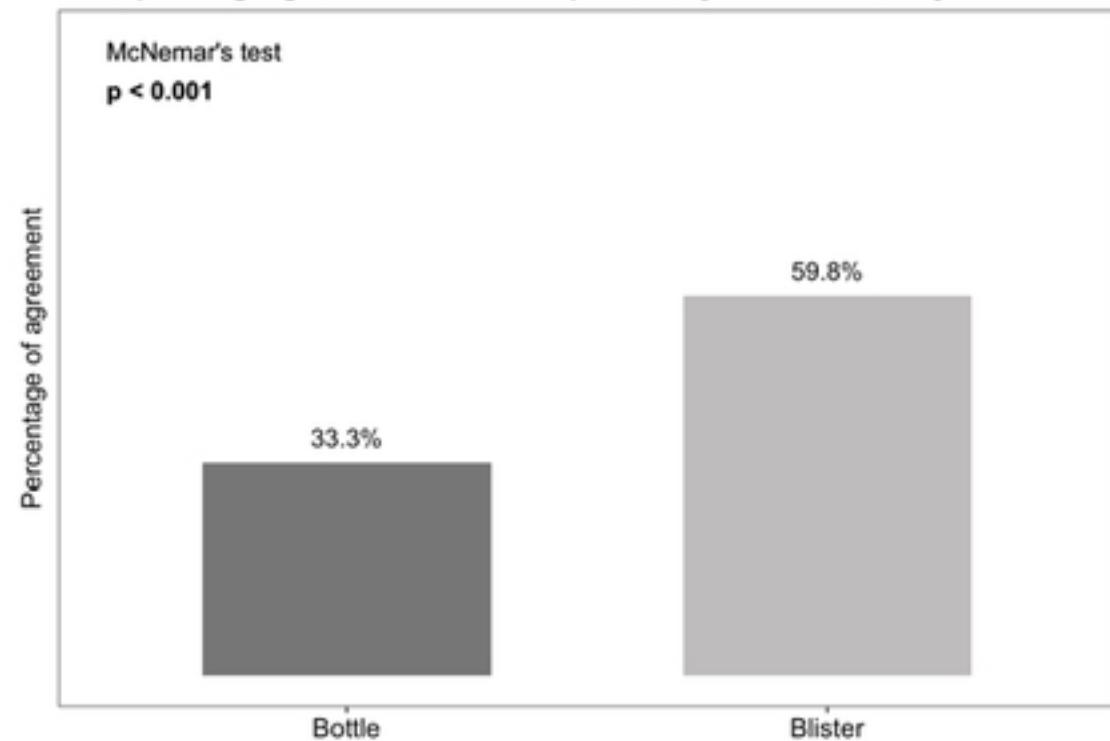

**This packaging reminds me that I need to refill my prescription**

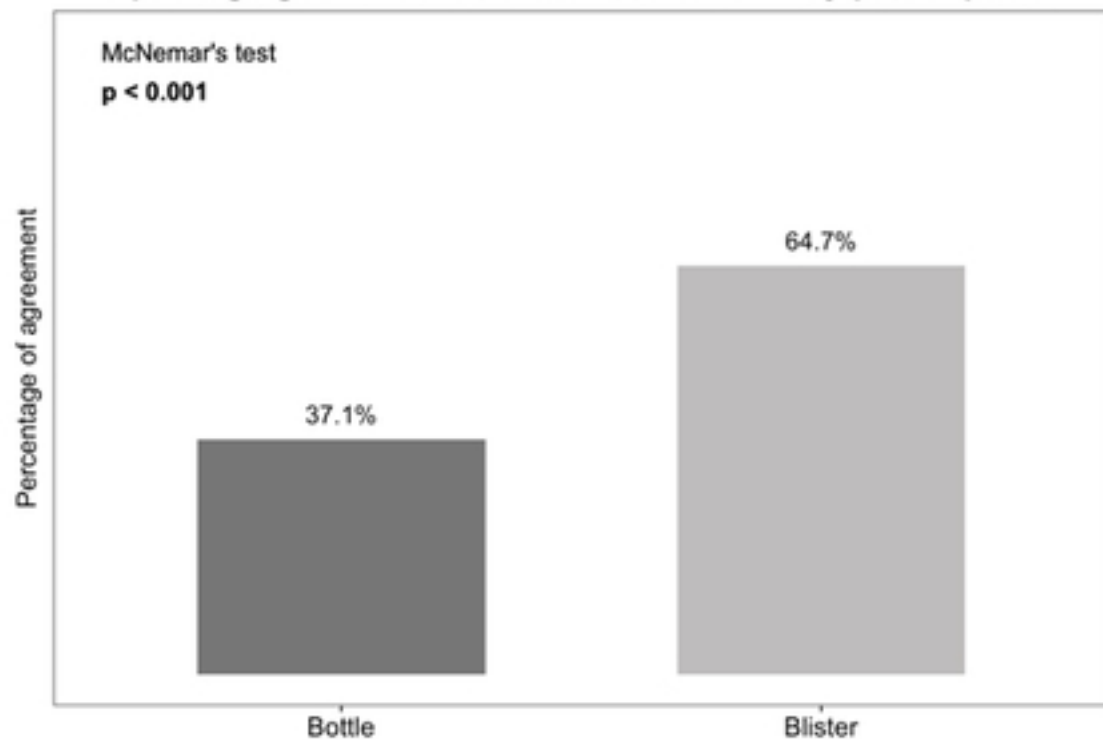

**I don't like this packaging**

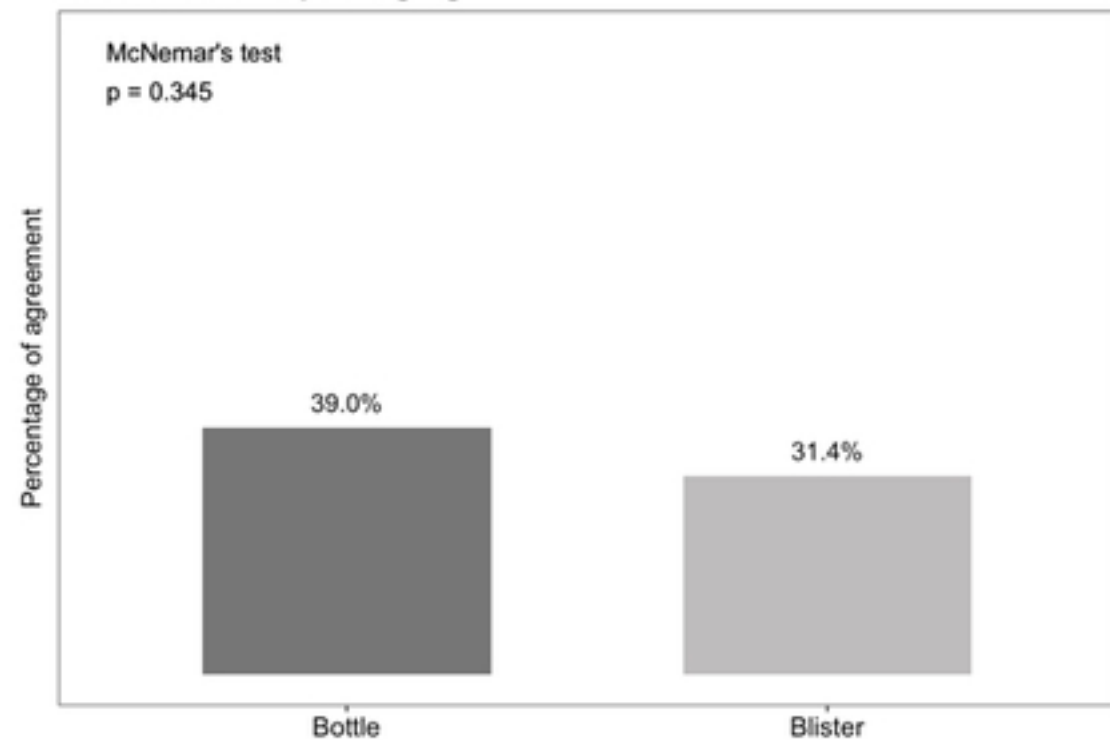

Figure 3



# I am more satisfied with this packaging than with the previous one

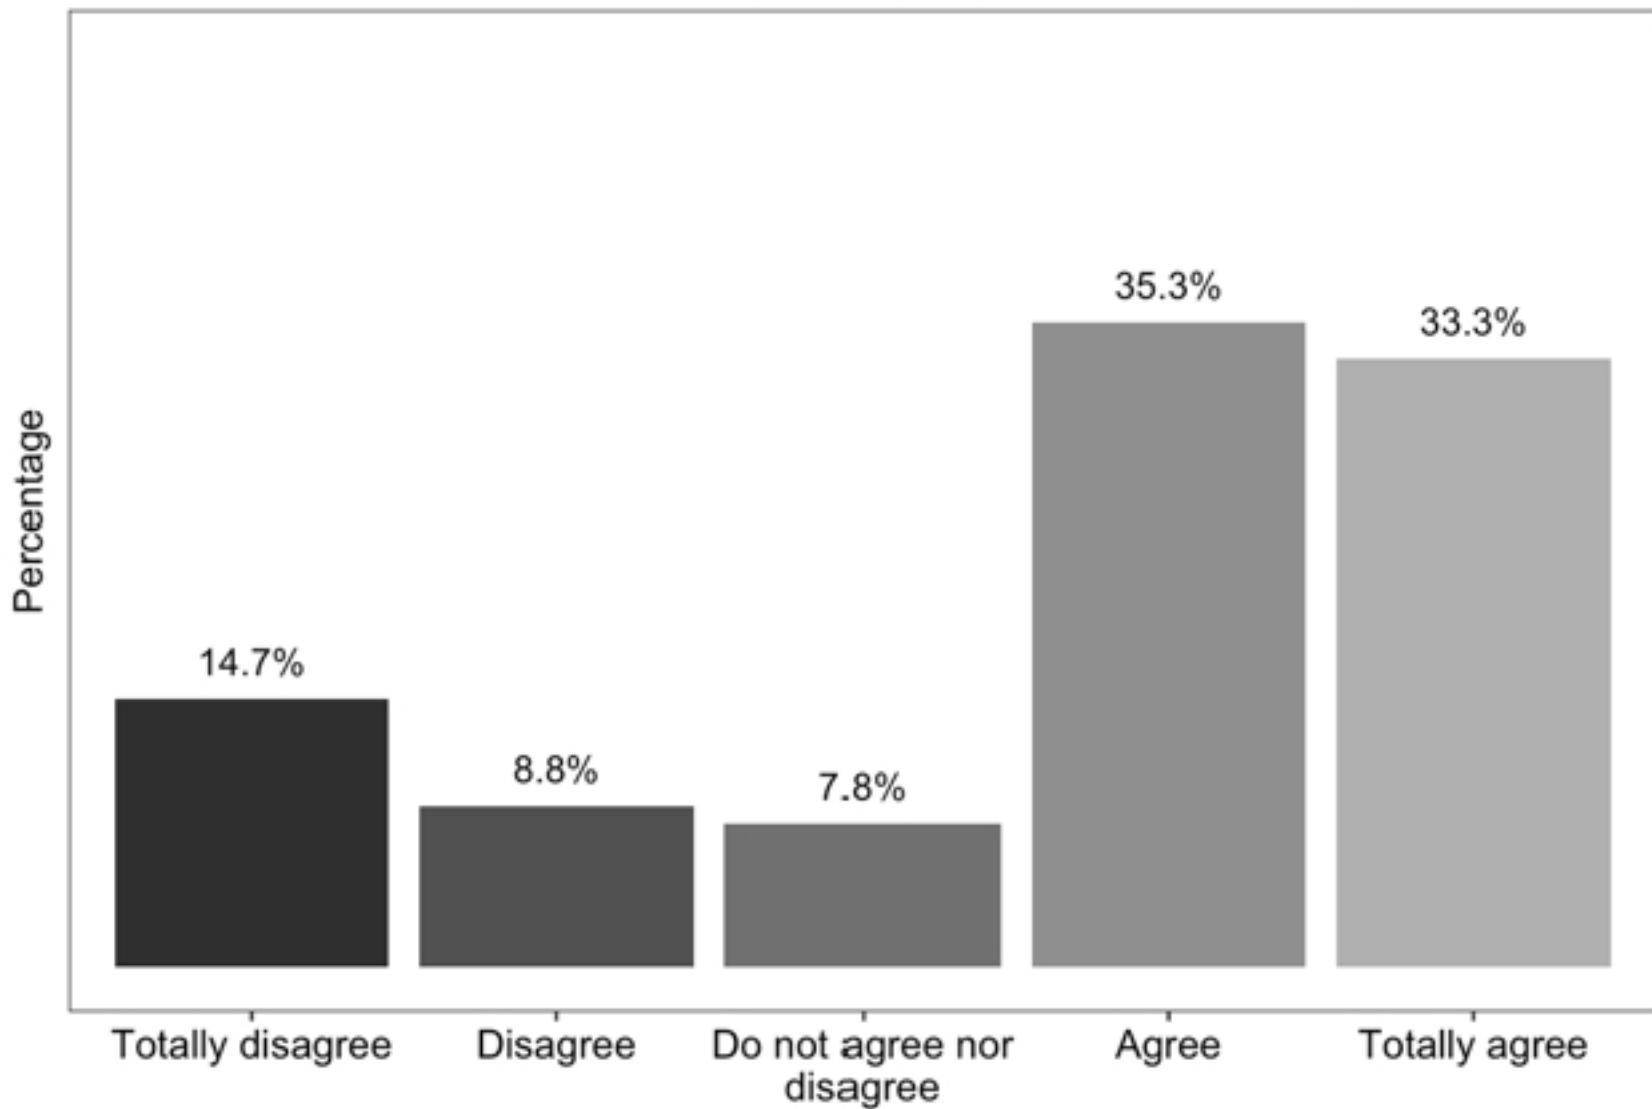

Figure 4
